# Supplementary material for: Layer-by-layer assembly of polyoxometalate–pyrene-decorated fluorescent microspheres for the suspension immunoassay of Listeria monocytogenes
Source: Royal Society of Chemistry journal article supplement (doi:10.1039/c6tb00986g), 2016-01-01
Supplement: c6tb00986g1.pdf [file c6tb00986g1.pdf]

## Supporting Information

### Layer-by-Layer Assembly of Polyoxometalate-Pyrene-Decorated Fluorescent Microspheres for Suspension Immunoassay of *Listeria Monocytogenes*

Wen Ju<sup>a†</sup>, Xiuling Song<sup>a†</sup>, Gang Yan<sup>b†</sup>, Kun Xu<sup>a</sup>, Juan Wang<sup>a</sup>, Dehui Yin<sup>a</sup>, Li Li<sup>a</sup>, Xiaofeng Qu<sup>a</sup>, Yangguang Li<sup>b\*</sup>, Juan Li<sup>a\*</sup>

<sup>a</sup>.College of Public Health, University of Jilin, Changchun, 130021, China; <sup>b</sup>. Key laboratory of Polyoxometalate Science of Ministry of Education, Faculty of Chemistry, Northeast Normal University, Changchun, 130024, China

#### 1 Crystal structural data and figures

#### 2 Additional physical measurements

#### 3 Additional LM detection experiments

## 1. Crystal structural figures and data of POM-pyrene 1

The single-crystal X-ray diffraction analysis shows that compound 1 crystallizes in the monoclinic C2/c space group. The structural unit of compound 1 consists of one  $[V_6O_{13}\{(OCH_2)_3CNH-CH_2-C_{16}H_9\}_2]_2^-$  hybrid polyoxoanion and two TBA<sup>+</sup> counter cations. In the hybrid polyoxoanion of 1, the central inorganic cluster  $\{V_6O_{19}\}$  shows a typical Lindqvist-type structure, in which six  $\{VO_6\}$  octahedra are connected with each other in an edge-sharing mode. Theoretically,  $\{V_6O_{19}\}$  moiety possesses eight negative charges, however, the introduction of two Tris ligands on the surface of  $\{V_6O_{19}\}$  fragment brings six sharing O atoms between POM and Tris units (see Fig. S1 and Fig. S2), dramatically decreases the negative charges of the hybrid molecule, and stabilize the whole  $\{V_6O_{19}\}$  unit. Based on the covalent connections between POM and Tris linkers, two pyrene groups are introduced into the inorganic POM units, forming a butterfly-type hybrid molecule with two negative charges. It is noteworthy that the introduction of Tris(hydroxymethyl) groups into POM unit led to two types of V-O bond lengths. The bond lengths of V-O-carbon range from 2.002(4) to 2.026(4) Å, while the bond lengths of V-O-POM are in the range of 1.810(4)-1.825(4) Å. In the packing arrangement, the adjacent hybrid molecules are stacked together by the obvious  $\pi$ - $\pi$  interactions between two adjacent parallel pyrene planes derived from different POM-pyrene hybrid molecules as well as extensive weak C-H...O intermolecular interactions between POM units and adjacent pyrene groups, forming the 3-D supramolecular open framework with 1-D channels along c axis (Fig. S3 and Fig. S4). The short vertical distance between two adjacent pyrene planes is ca. 3.259 Å (Fig. S5). The channels are filled with TBA<sup>+</sup> cations, charge-balancing the whole negative supramolecular framework.

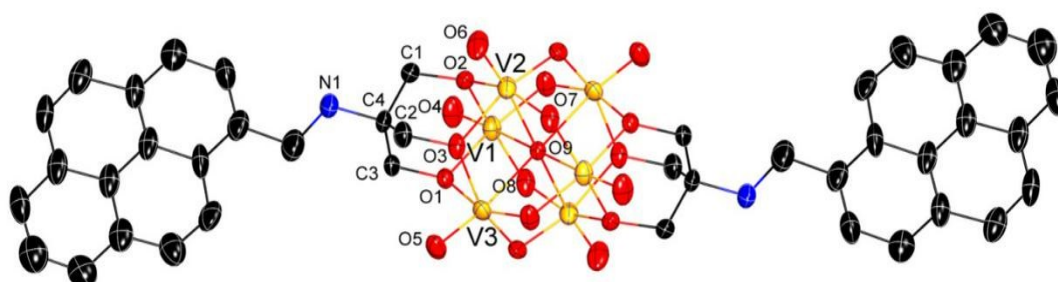

Fig. S1 ORTEP diagram of the structure of POM-pyrene 1 with thermal ellipsoids at 30% probability

displacement. All H atoms are omitted for clarity.

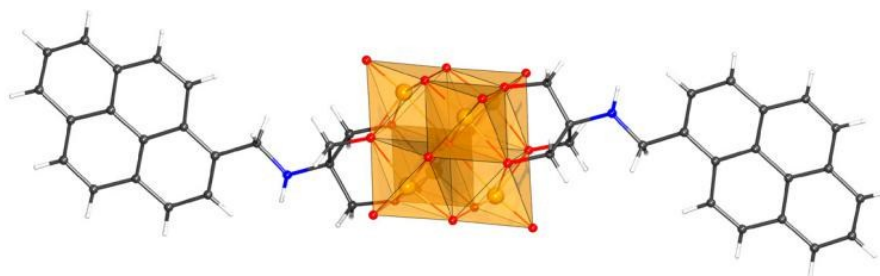

**Fig. S2** Polyhedral and ball-and-stick view of the structure of POM-pyrene 1

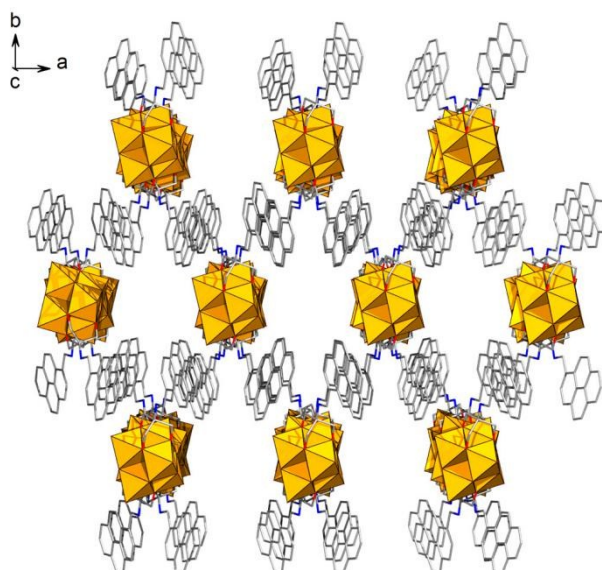

**Fig. S3** Packing arrangement of POM-pyrene in compound 1 viewed along c axis. H atoms and TBA<sup>+</sup> cations are omitted for clarity.

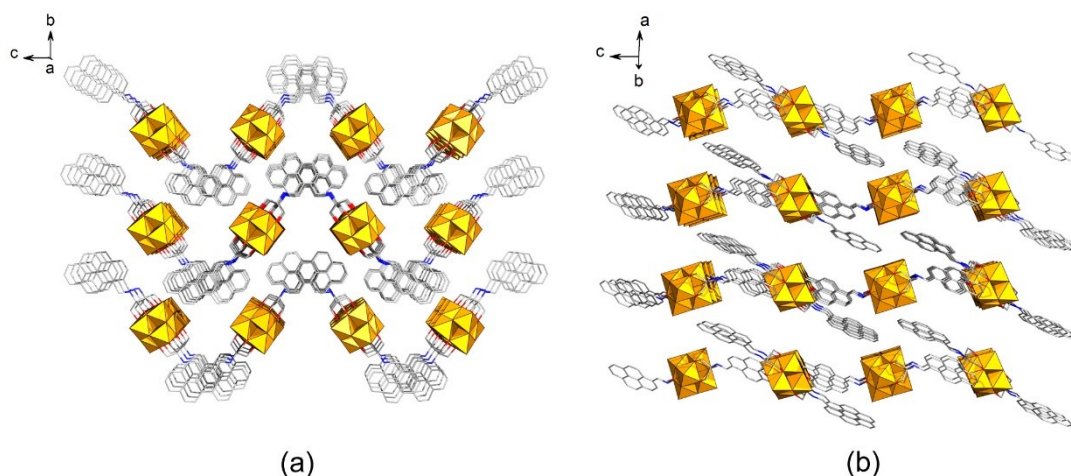

**Fig. S4** Packing arrangement of POM-pyrene units in the crystal structure of **1** viewed along **(a)** *a* axis and **(b)** *b* axis. All H atoms and TBA<sup>+</sup> cations are omitted for clarity.

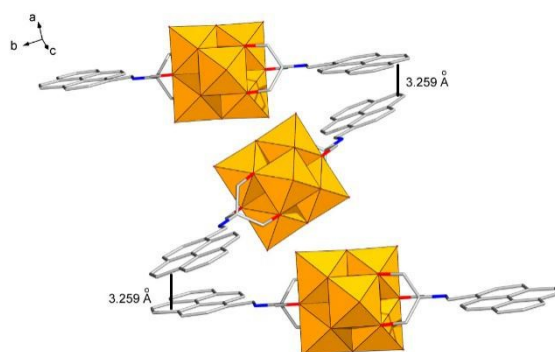

**Fig. S5** Intermolecular  $\pi\cdots\pi$  interactions between two pyrene groups from adjacent hybrid POM-pyrene units. The short distance between two pyrene planes is 3.259 Å.

Diffractive quality single crystal of compound **1** was mounted on a glass fiber and the crystallographic data of **1** was collected at 150(2) K on a Rigaku R-axis Rapid IP diffractometer using graphite monochromatic Mo-K $\alpha$  radiation ( $\lambda = 0.71073$  Å) and the IP technique. A multi-scan adsorption correction method was used. The structure of **1** was solved by the direct method and refined by the full-matrix least-squares method on F<sup>2</sup> using the SHELXTL-97 crystallographic software package. Anisotropic thermal parameters were used to refine non-hydrogen atoms. Hydrogen atoms on the organic C centers were included in the refinement riding on their respective parent C atoms. The crystal data and structure refinement result of POM-pyrene **1** is summarized in Table S1.

**Table S1** Crystal data and structure refinements for compound **1**.

|                                                              |                                                                                |
|--------------------------------------------------------------|--------------------------------------------------------------------------------|
| Empirical formula                                            | C <sub>74</sub> H <sub>108</sub> N <sub>4</sub> O <sub>19</sub> V <sub>6</sub> |
| Formula weight                                               | 1663.28                                                                        |
| <i>T</i> (K)                                                 | 150(2)                                                                         |
| $\lambda$ (Å)                                                | 0.71073                                                                        |
| Crystal system                                               | monoclinic                                                                     |
| Space group                                                  | C2/c                                                                           |
| <i>a</i> (Å)                                                 | 12.5396(2)                                                                     |
| <i>b</i> (Å)                                                 | 24.454(2)                                                                      |
| <i>c</i> (Å)                                                 | 25.013(2)                                                                      |
| $\beta$ (°)                                                  | 93.069(2)                                                                      |
| <i>V</i> (Å <sup>3</sup> )                                   | 7658.9                                                                         |
| <i>Z</i>                                                     | 4                                                                              |
| <i>D</i> <sub>calcd</sub> (g cm <sup>-3</sup> )              | 1.442                                                                          |
| Absorption coefficient (mm <sup>-1</sup> )                   | 0.774                                                                          |
| <i>F</i> (000)                                               | 3480                                                                           |
| $\vartheta$ range (°)                                        | 1.67-25.00                                                                     |
| Reflections collected                                        | 19461                                                                          |
| Unique reflections/ <i>R</i> <sub>int</sub>                  | 6742/0.0617                                                                    |
| GOF                                                          | 1.001                                                                          |
| <i>R</i> <sub>1</sub> ( <i>I</i> > 2 $\sigma$ ) <sup>a</sup> | 0.0682                                                                         |
| <i>wR</i> <sub>2</sub> (all data) <sup>b</sup>               | 0.1654                                                                         |

Note: <sup>a</sup> $R_1 = \sum ||F_o| - |F_c|| / \sum |F_o|$ ; <sup>b</sup> $wR_2 = \sum [w(F_o^2 - F_c^2)^2] / \sum [w(F_o^2)^2]^{1/2}$ .

**Table S2** Selected bond lengths (Å) and angles (°) of POM-pyrene **1**

|                   |            |                 |            |
|-------------------|------------|-----------------|------------|
| V(1)-O(4)         | 1.594(4)   | V(2)-O(6)       | 1.585(4)   |
| V(1)-O(8)         | 1.810(4)   | V(2)-O(10)      | 1.816(4)   |
| V(1)-O(7)         | 1.825(4)   | V(2)-O(8)       | 1.823(4)   |
| V(1)-O(1)#1       | 2.002(4)   | V(2)-O(2)       | 2.009(4)   |
| V(1)-O(2)#1       | 2.011(4)   | V(2)-O(3)       | 2.026(4)   |
| V(1)-O(9)         | 2.2280(10) | V(2)-O(9)       | 2.2374(10) |
| V(3)-O(5)         | 1.589(4)   | V(3)-O(1)       | 2.004(4)   |
| V(3)-O(10)#1      | 1.812(4)   | V(3)-O(3)       | 2.021(4)   |
| V(3)-O(7)         | 1.815(4)   | V(3)-O(9)       | 2.2302(10) |
| O(4)-V(1)-O(9)    | 172.68(18) | O(6)-V(2)-O(9)  | 172.40(18) |
| O(8)-V(1)-O(9)    | 81.50(14)  | O(10)-V(2)-O(9) | 81.33(13)  |
| O(7)-V(1)-O(9)    | 81.20(13)  | O(8)-V(2)-O(9)  | 80.96(13)  |
| O(1)#1-V(1)-O(9)  | 77.49(11)  | O(2)-V(2)-O(9)  | 77.24(12)  |
| O(2)#1-V(1)-O(9)  | 77.41(12)  | O(3)-V(2)-O(9)  | 77.41(11)  |
| O(5)-V(3)-O(9)    | 171.91(17) | O(1)-V(3)-O(9)  | 77.39(11)  |
| O(10)#1-V(3)-O(9) | 81.62(13)  | O(3)-V(3)-O(9)  | 77.67(12)  |
| O(7)-V(3)-O(9)    | 81.34(13)  |                 |            |

Symmetry transformations used to generate equivalent atoms: #1 -x+2,-y+1,-z+1

## 2. Additional physical measurements

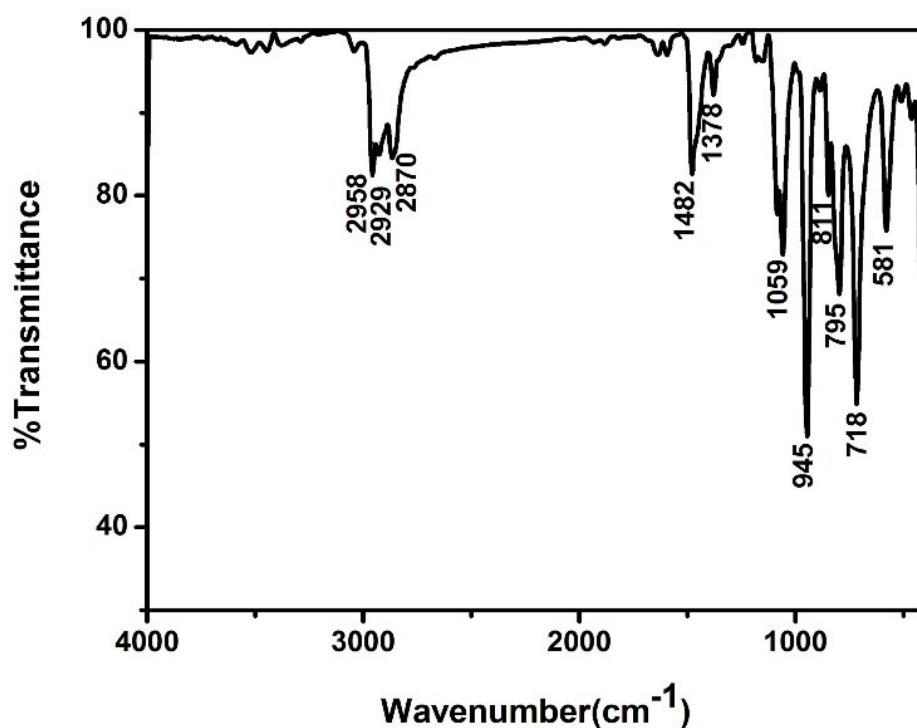

Fig. S6 IR spectrum of compound 1

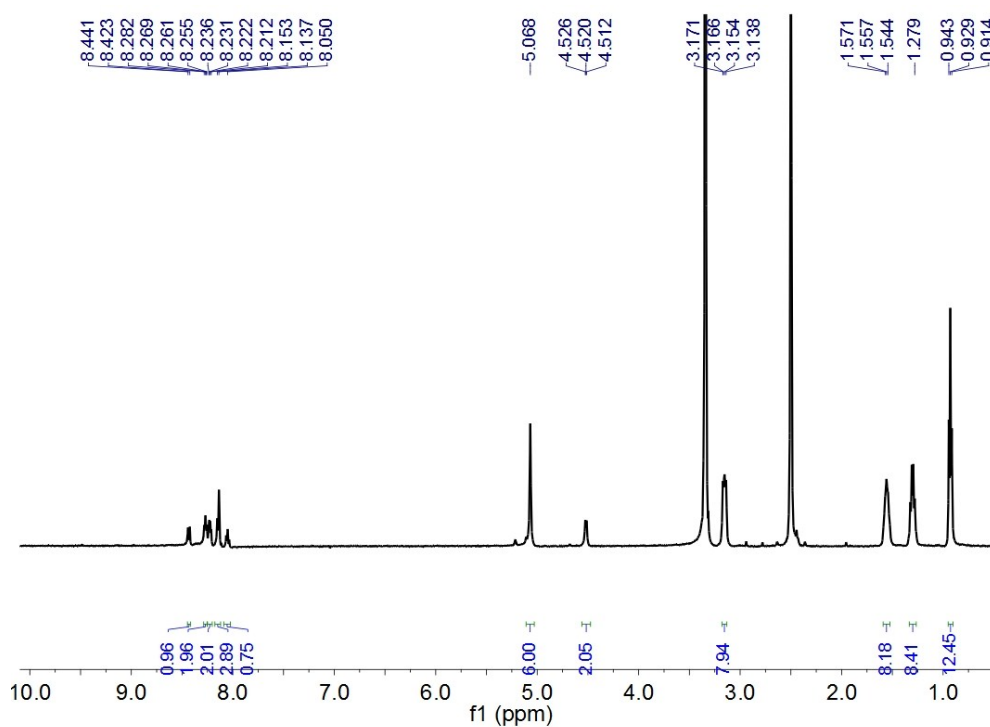

Fig. S7 <sup>1</sup>H NMR of compound 1 in DMSO. <sup>1</sup>H NMR (500 MHz, )  $\delta$  8.43 (d,  $J$  = 9.0 Hz, 1H), 8.27 (t,  $J$  = 7.0 Hz, 2H), 8.24 – 8.22 (m, 2H), 8.14 (d,  $J$  = 8.0 Hz, 3H), 8.05 (t,  $J$  = 7.5 Hz, 1H), 5.07 (s, 6H), 4.52 (d,  $J$  = 7.0 Hz, 2H), 3.17 – 3.14 (m, 8H), 1.57 – 1.54 (m, 8H), 1.34 – 1.27 (m, 8H), 0.93 (t,  $J$  = 7.5 Hz, 12H).

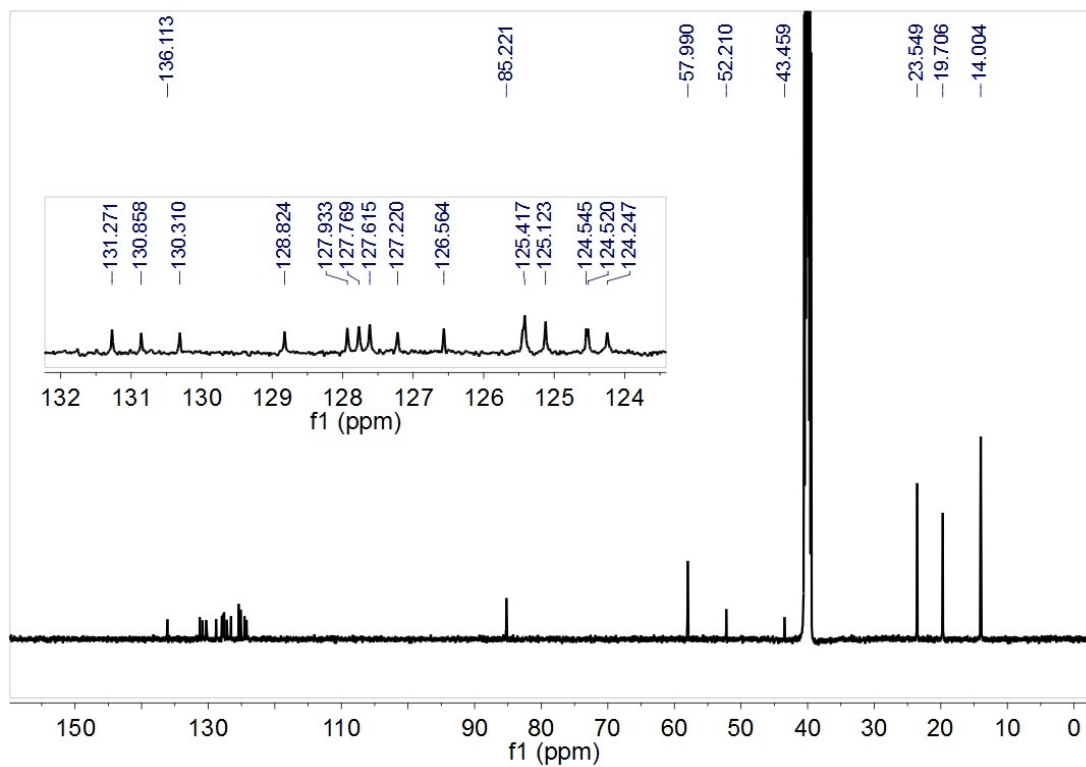

**Fig. S8**  $^{13}\text{C}$  NMR of compound **1** in DMSO.  $^{13}\text{C}$  NMR (125 MHz, DMSO) :  $\delta$  136.1, 131.23, 130.9, 130.3, 128.8, 127.9, 127.8, 127.6, 127.2, 126.6, 125.4, 125.1, 124.6, 124.5, 124.3, 85.2, 58.0, 52.2, 43.5, 23.6, 19.7, 14.0.



### 3 Additional LM detection experiments

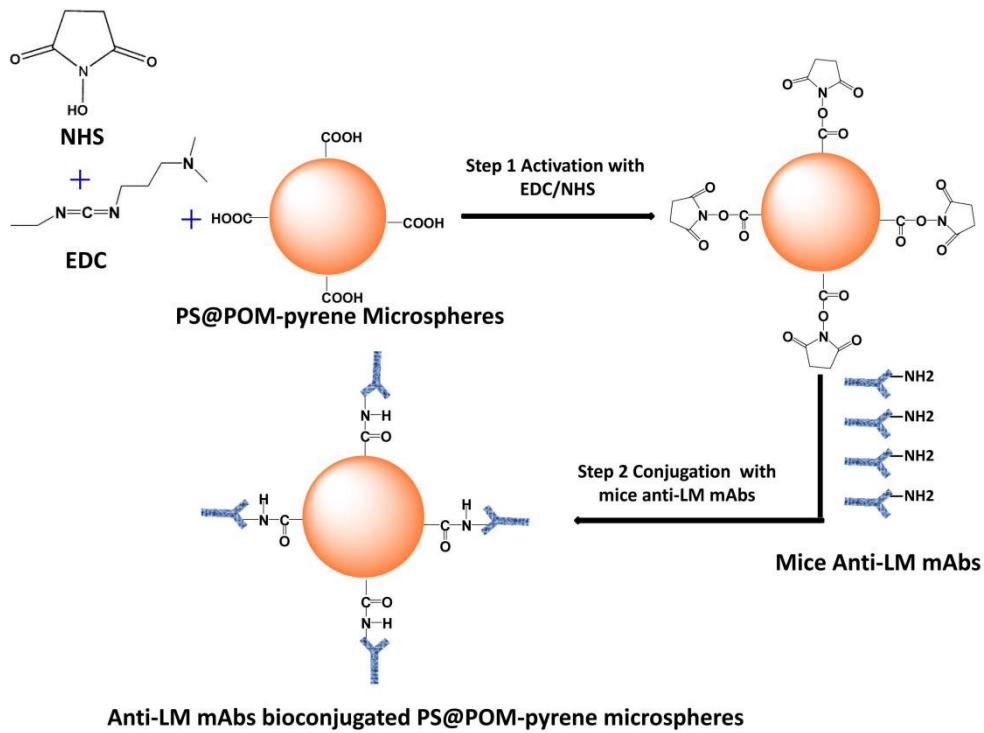

**Scheme S1** Schematic view of biofunctionalization steps of PS@POM-pyrene microspheres conjugated with anti-LM mAbs

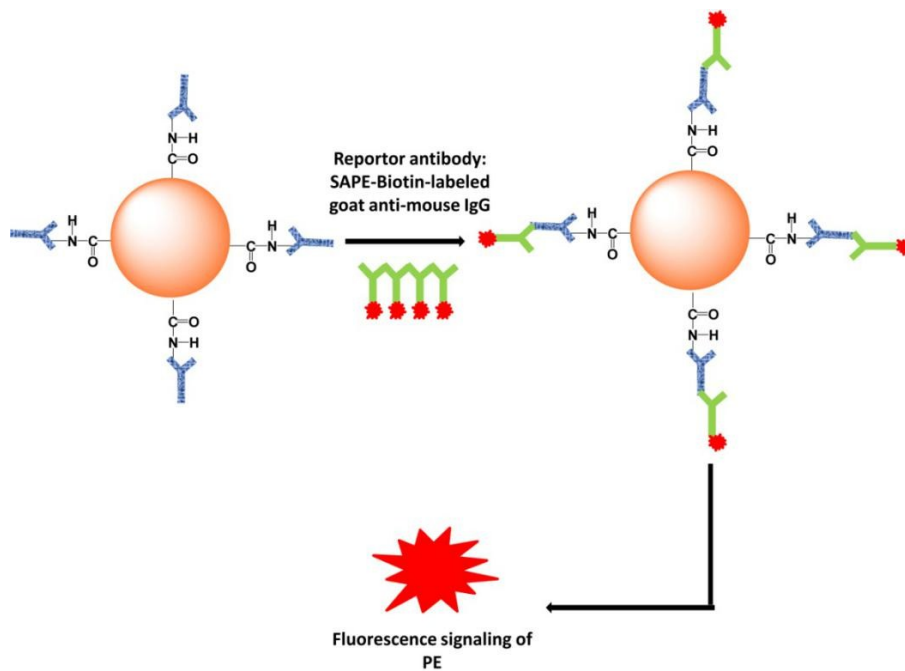

**Scheme S2** Schematic view of working principle of fluorescence microsphere-based suspension immunoassay

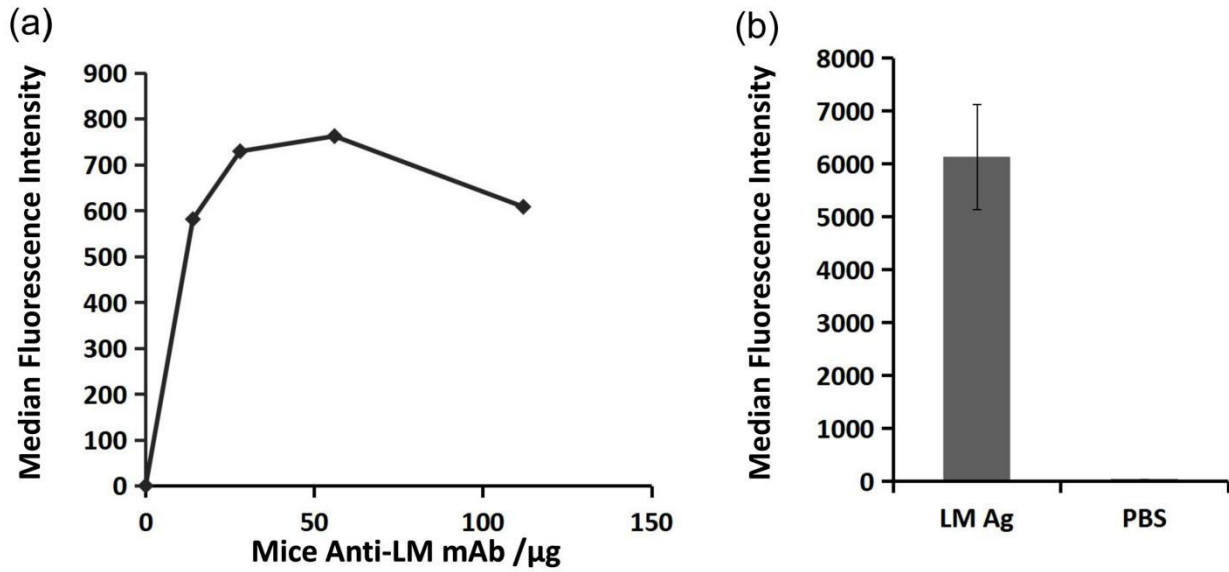

**Fig. S9** (a) The change of MFI values when different amounts of mice anti-LM mAb were used for coupling with  $10^6$  PS@POM-pyrene microspheres in the binding assay. The MFI values were increased when more mAb was coupled on the surface of the microspheres. (b) Median fluorescence intensity (MFI) values of the fluorescence microspheres incubated with LM Ag (n=5) and no LM Ag (PBS only, n=5) based on FCM measurements. During the measurement, the immunodiagnostic complex with fluorescently labeled streptavidin-PE is obtained. LM Ag samples incubated with anti-LM mAbs bioconjugated  $P_6$  microspheres showed high MFI values, while low MFI value of PBS samples was detected.

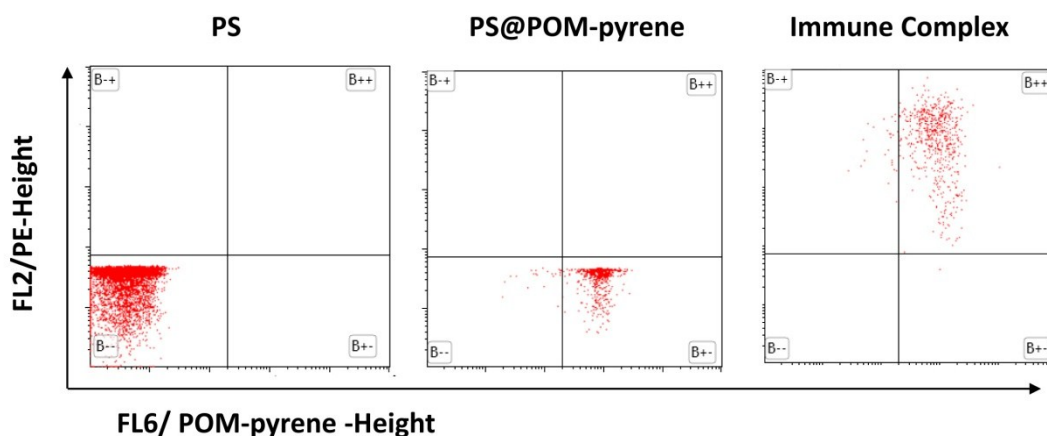

**Fig. S10** Flow cytometry of PS (POM-pyrene negative and PE positive), PS@POM-pyrene (POM-pyrene positive and PE negative) and Immune complex (POM-pyrene positive and PE negative)

**Table S3.** Repeatability of PS@POM-pyrene used for detecting LM Ag

|       | LM-sample 1 | LM-sample 2 | PBS   |
|-------|-------------|-------------|-------|
| MFI-1 | 5560        | 3723        | 42    |
| MFI-2 | 5314        | 3540        | 44    |
| MFI-3 | 5560        | 3703        | 44    |
| Mean  | 5478.00     | 3655.33     | 43.33 |
| S     | 115.97      | 81.96       | 0.94  |
| CV%   | 2.12        | 2.24        | 2.18  |
